# Supplementary material for: Multistage antiplasmodial activity of hydroxyethylamine compounds, in vitro and in vivo evaluations
Source: Royal Society of Chemistry journal article supplement (doi:10.1039/d0ra03997g), 2020-01-01
Supplement: d0ra03997g1.pdf [file d0ra03997g1.pdf]

## SUPPLEMENTARY INFORMATION

### Multistage Antiplasmodial Activity of Hydroxyethylamine Compounds, *In vitro* and *In vivo* Evaluations

Neha Sharma<sup>1</sup>, Yash Gupta<sup>2</sup> Meenakshi Bansal<sup>1</sup>, Snigdha Singh<sup>1</sup>, Prateek Pathak<sup>3</sup>, Mohd Shahbaaz<sup>3,4</sup>, Raman Mathur<sup>2</sup>, Jyoti Singh<sup>5</sup>, Mohammad Kashif<sup>5</sup>, Maria Grishina<sup>3</sup>, Vladimir Potemkin<sup>3</sup>, Vinoth Rajendran<sup>6</sup>, Poonam<sup>3,7</sup>, Prakasha Kempaiah<sup>2</sup>, Agam P Singh<sup>5,\*</sup>, Brijesh Rathi<sup>1,3,\*</sup>

<sup>1</sup>Laboratory for Translational Chemistry and Drug Discovery, Department of Chemistry, Hansraj College University Enclave, University of Delhi, Delhi 110007 India

<sup>2</sup>Department of Medicine, Loyola University Stritch School of Medicine, 2160 South First Avenue, Chicago, Illinois 60153, United States

<sup>3</sup>South Ural State University, Laboratory of Computational Modelling of Drugs, 454080, Russia

<sup>4</sup>South African National Bioinformatics Institute, University of the Western Cape, Private Bag X17, Bellville, Cape Town 7535, South Africa

<sup>5</sup>Infectious Diseases Laboratory, National Institute of Immunology, Aruna Asaf Ali Marg, New Delhi 110067, India

<sup>6</sup>Department of Microbiology, School of Life Sciences, Pondicherry University, Puducherry 605014, India

<sup>7</sup>Department of Chemistry, Miranda House, University of Delhi, Delhi 110007 India.

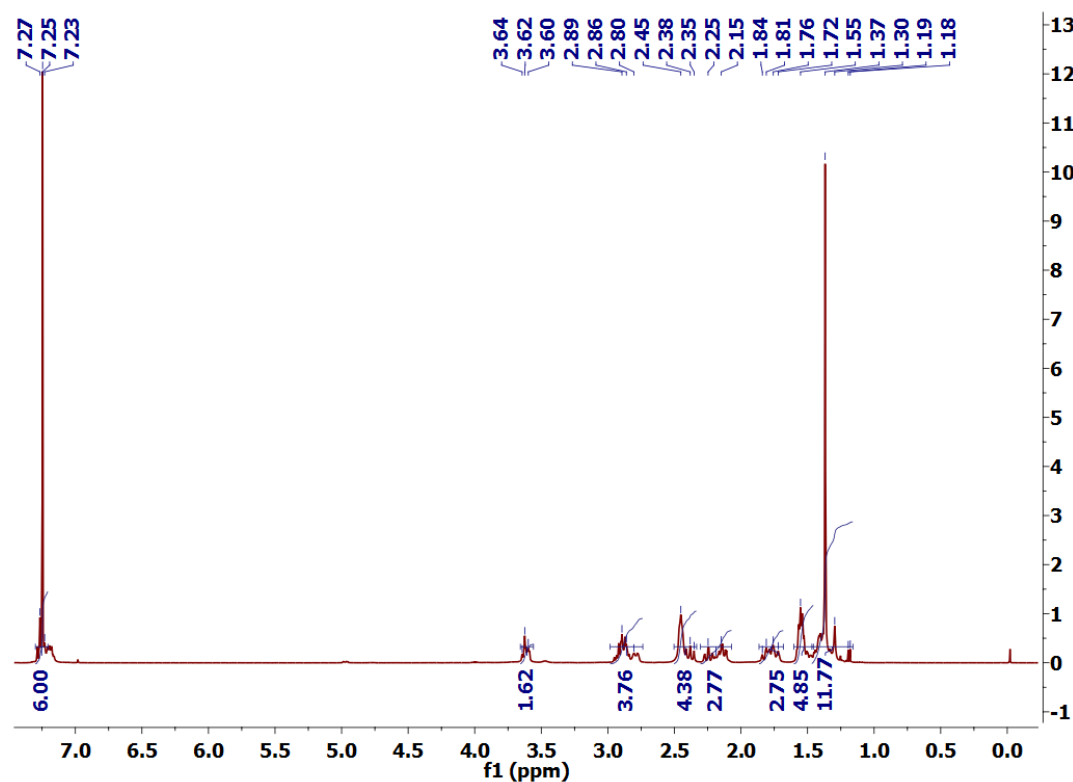

Fig S1. <sup>1</sup>H NMR spectra of compound 1 in CDCl<sub>3</sub>.

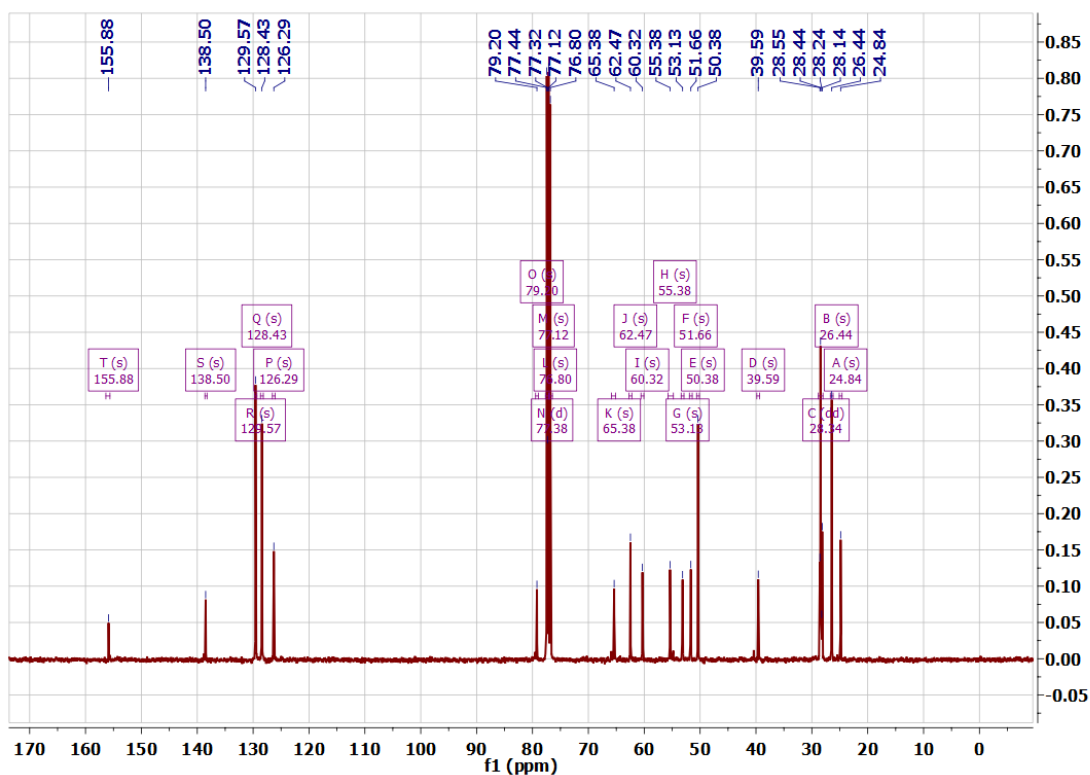

Fig S2. <sup>13</sup>C NMR spectra of compound 1 in CDCl<sub>3</sub>.

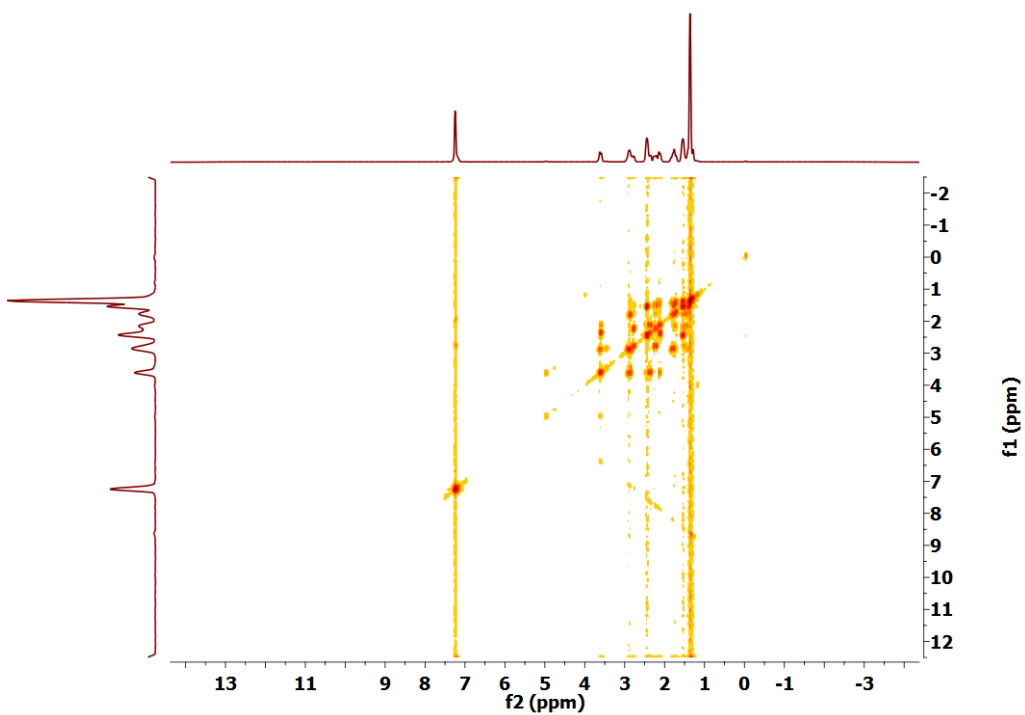

Fig S3. 2D COSY NMR spectra of compound 1 in CDCl<sub>3</sub>.

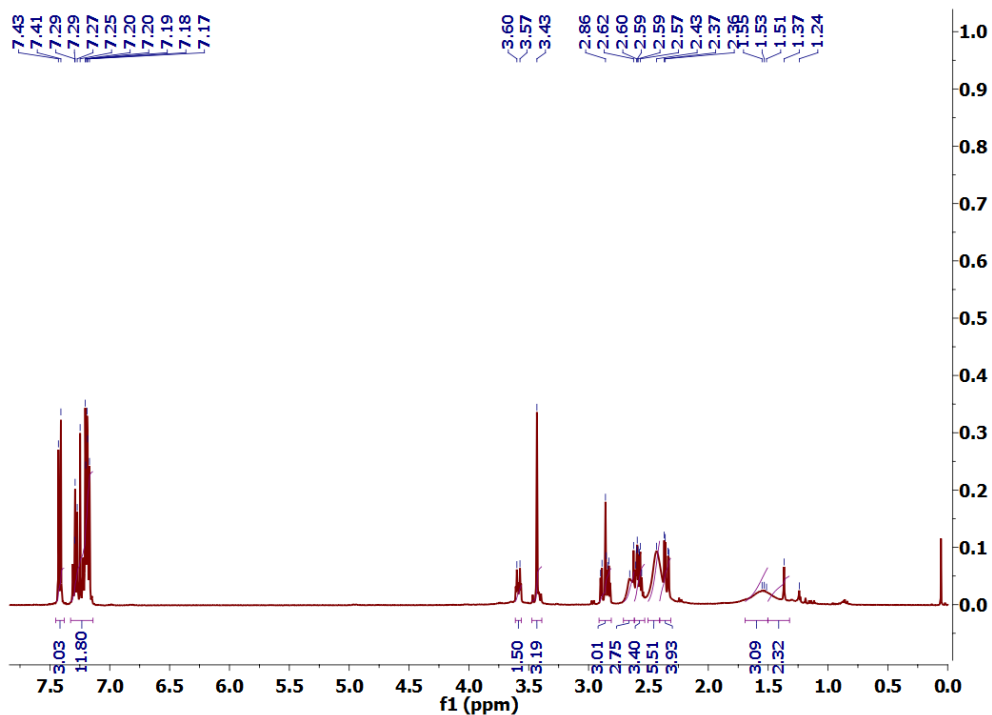

Fig S4 <sup>1</sup>H NMR spectra of compound 2 in CDCl<sub>3</sub>.

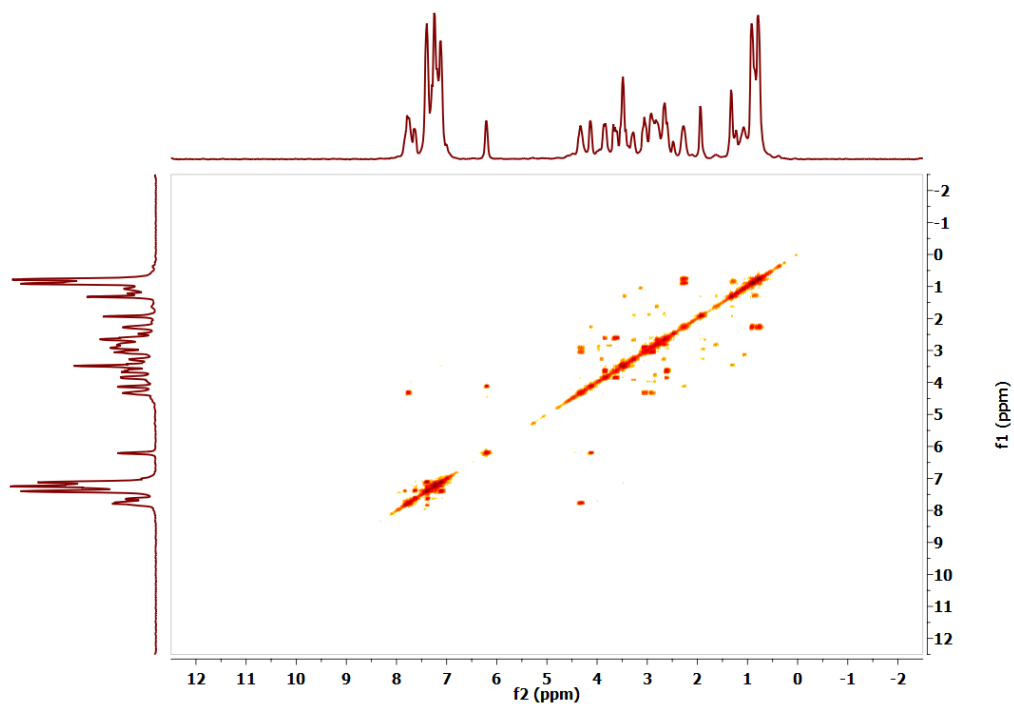

Fig S5. 2D COSY NMR of Compound 2 in CDCl<sub>3</sub>.
